# Supplementary material for: Epigenetic downregulation of STAT6 increases HIF-1α expression via mTOR/S6K/S6, leading to enhanced hypoxic viability of glioma cells
Source: Springer Nature journal article supplement (doi:10.1186/s40478-019-0798-z), 2019-09-17
Supplement: MOESM1 [file 25666916]

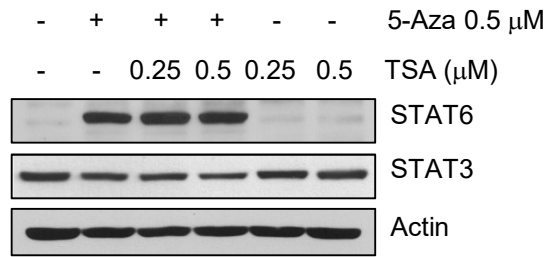

**Figure S1. Histone acetylation does not contribute to STAT6 silencing.** Related to Figure 2.

Immunoblot of STAT6 in U373 cells treated with or without indicated drugs for 3 days. TSA was treated for the last 1 day.

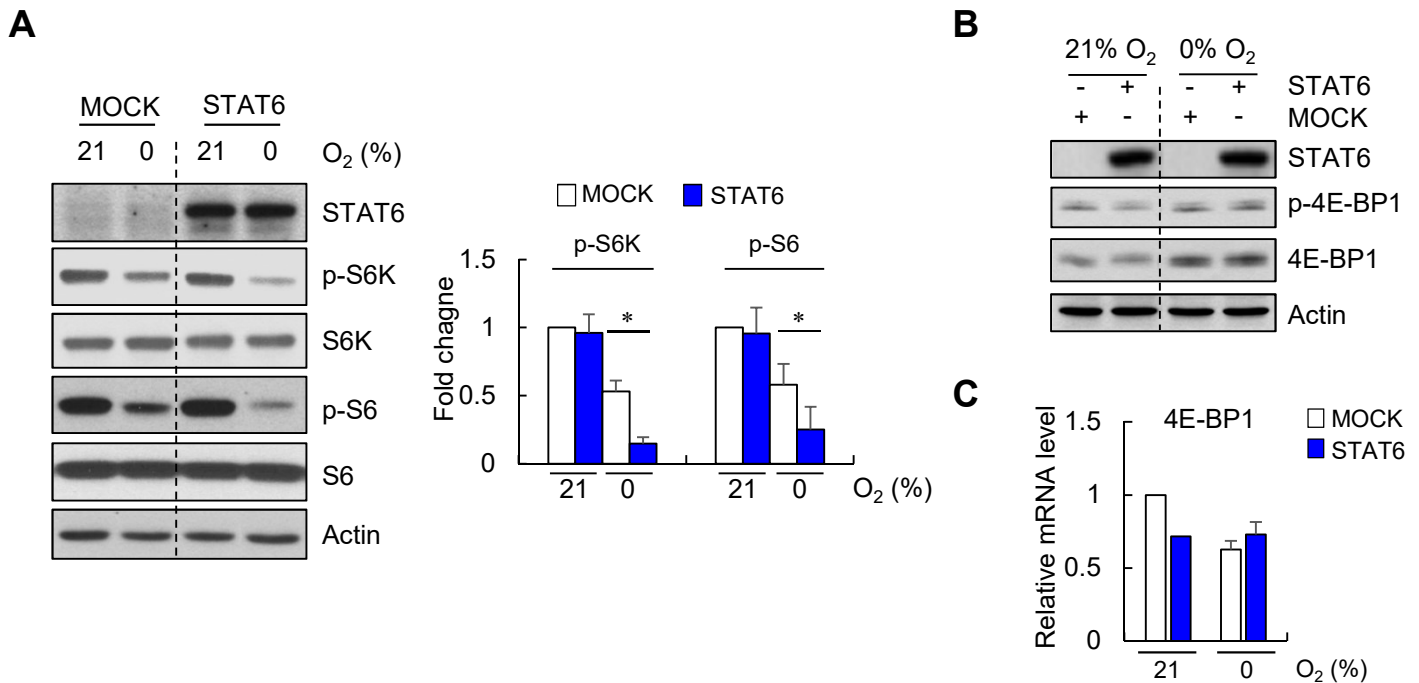

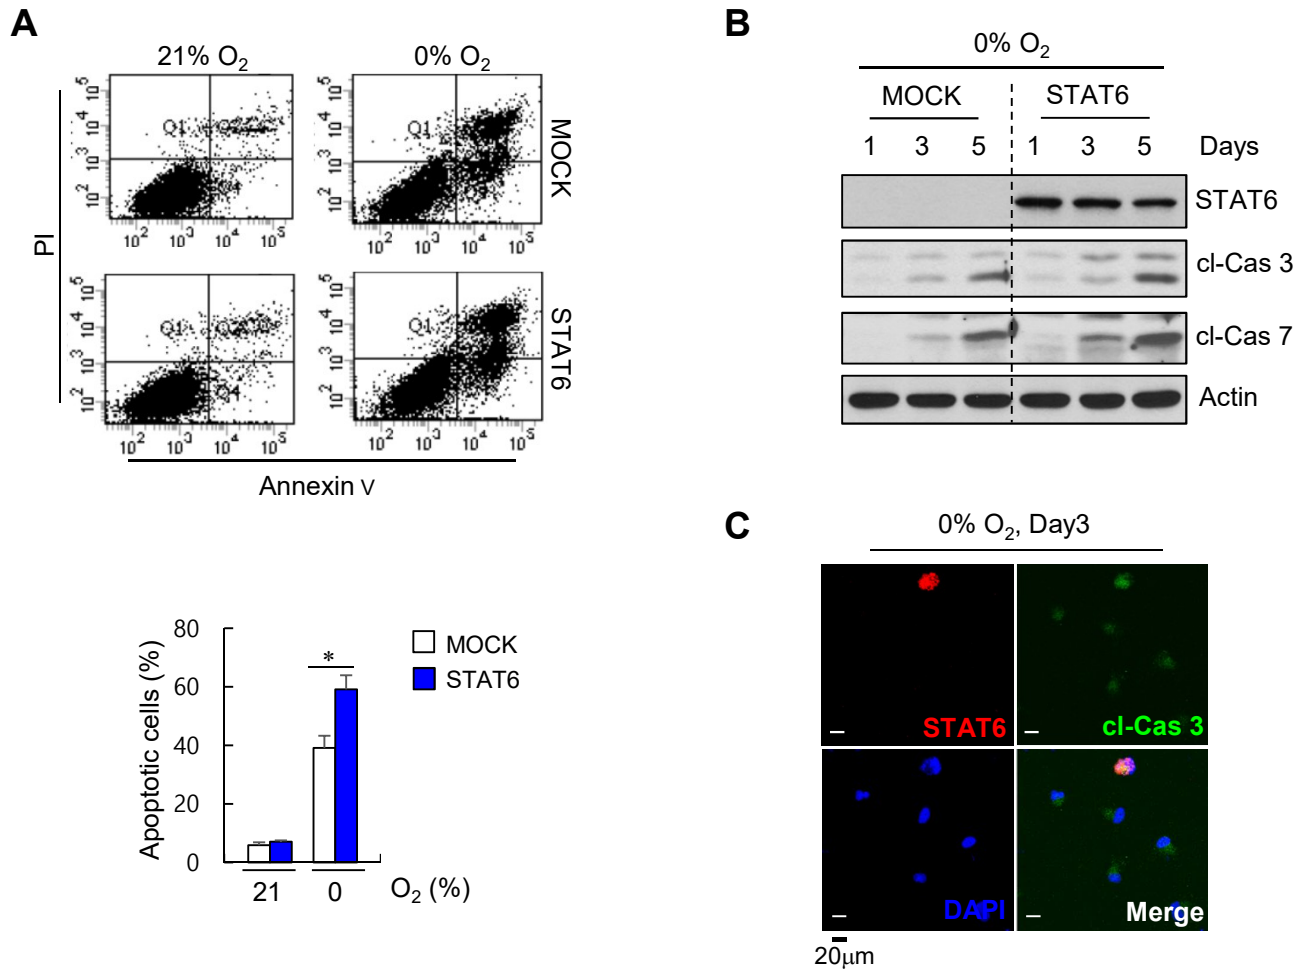

**Figure S3. STAT6-overexpressing U373MG cells exhibited increased apoptosis during hypoxia.** Related to Figure 6.

**A** Flow cytometry dot plots of annexin V and propidium iodide (PI) staining and summary data showing the percentage of annexin V-positive cells in MOCK- or STAT6-transfected U373MG cells exposed to 0% O<sub>2</sub> for 5 days. Results are presented as means ± SD (error bars) of three independent experiments (\*p < 0.05 vs. MOCK-transfected cells).

**B** Immunoblot of STAT6, cl-Cas 3, and 7 in MOCK- or STAT6-transfected U373MG cells exposed to 0% O<sub>2</sub> for indicated days.

**C** Immunofluorescence staining of cl-Cas 3 in STAT6 transfected U373MG cells exposed to 0% O<sub>2</sub> for 3 days.

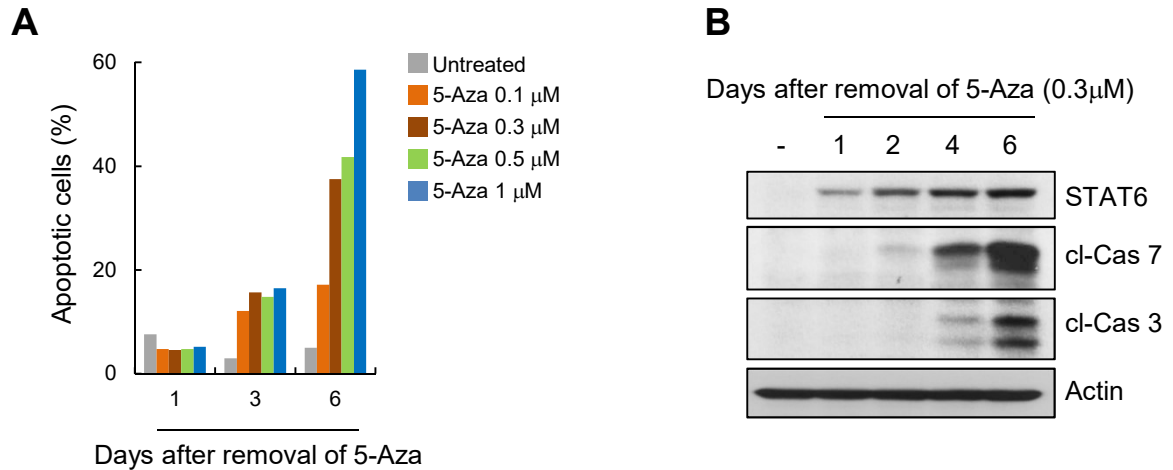

**Figure S4. Experimental validation for low dose, transient 5-Aza treatment.** Related to Figure 6.

**A, B** U373MG cells were incubated with or without indicated doses of 5-Aza for 2 days, and then incubated with fresh medium (without drugs) for the indicated days. Summary data showing the percentage of annexin V-positive cells (**A**) and immunoblot of STAT6, cl-Cas 7 and 3 (**B**).

**A**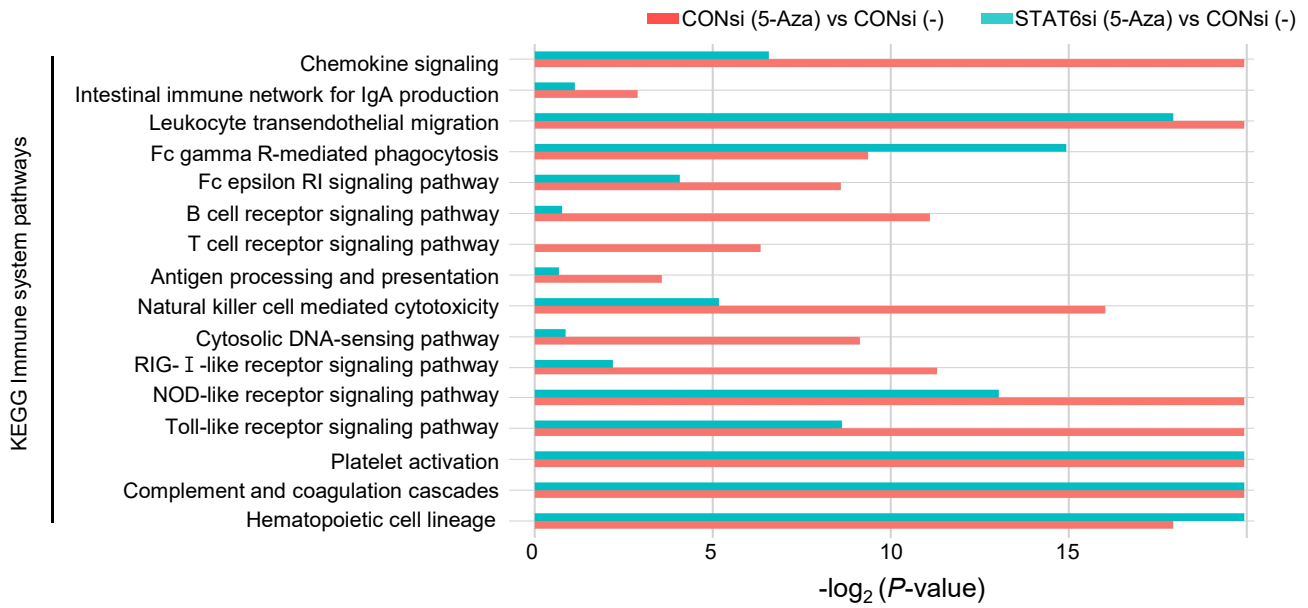**B**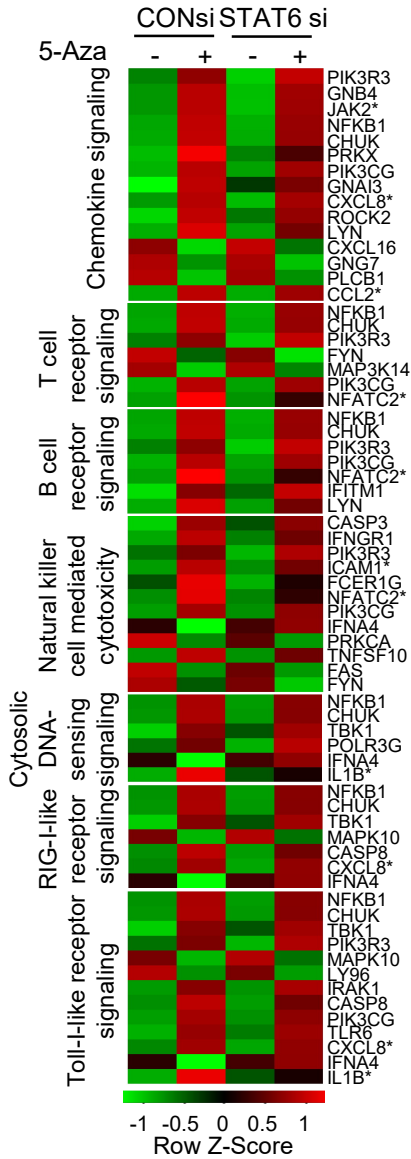**C**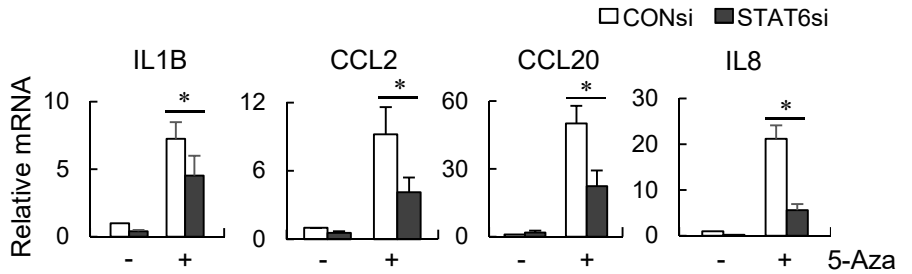**D**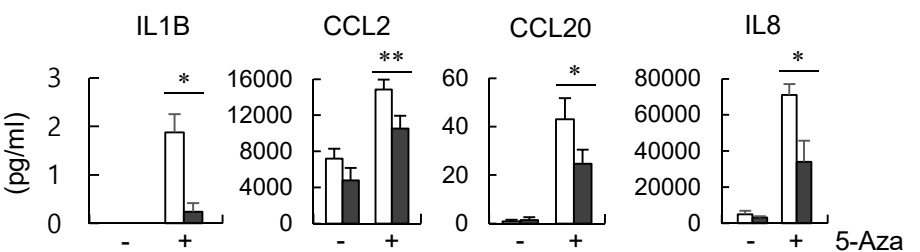**E**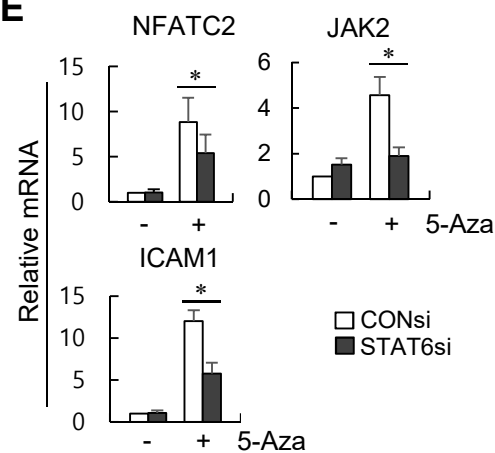**F**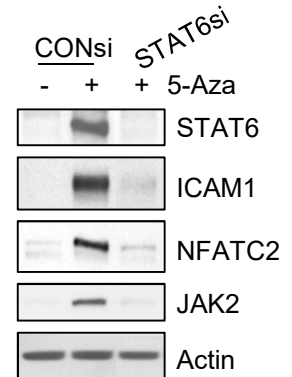

**Figure S5. 5-Aza-induced STAT6 expression increases the expression of immune-related genes.** Related to Figure 6.

**A-F** CONsi or STAT6si transfected U373MG cells were treated with or without 5-Aza (300nM) for 2 days and rested for 6 days before assaying. Microarray analysis of 5-Aza-induced STAT6 dependent genes. KEGG immune system pathway enrichment analysis for differentially regulated genes (DEGs) in CONsi transfected and STAT6si transfected cells with 5-Aza versus CONsi transfected cells without 5-Aza treatment. Bars indicate statistical significance shown as  $-\log_2$  of  $p$  value (**A**). Heat map of DEGs belong to the selected KEGG immune system pathways. Stars indicate genes confirmed by qRT-PCR, ELISA, and/or immunoblot (**B**). qRT-PCR (**C**) and ELISA (**D**) of IL1B, CCL2, CCL20, and CXCL8 and qRT-PCR (**E**) and immunoblot (**F**) of ICAM1, NFATC2, and JAK2 in siRNA transfected U373 cells with or without 5-Aza treatment. Error bars represent the SD of of three independent experiments; \* $p < 0.05$  and \*\* $p < 0.01$ .

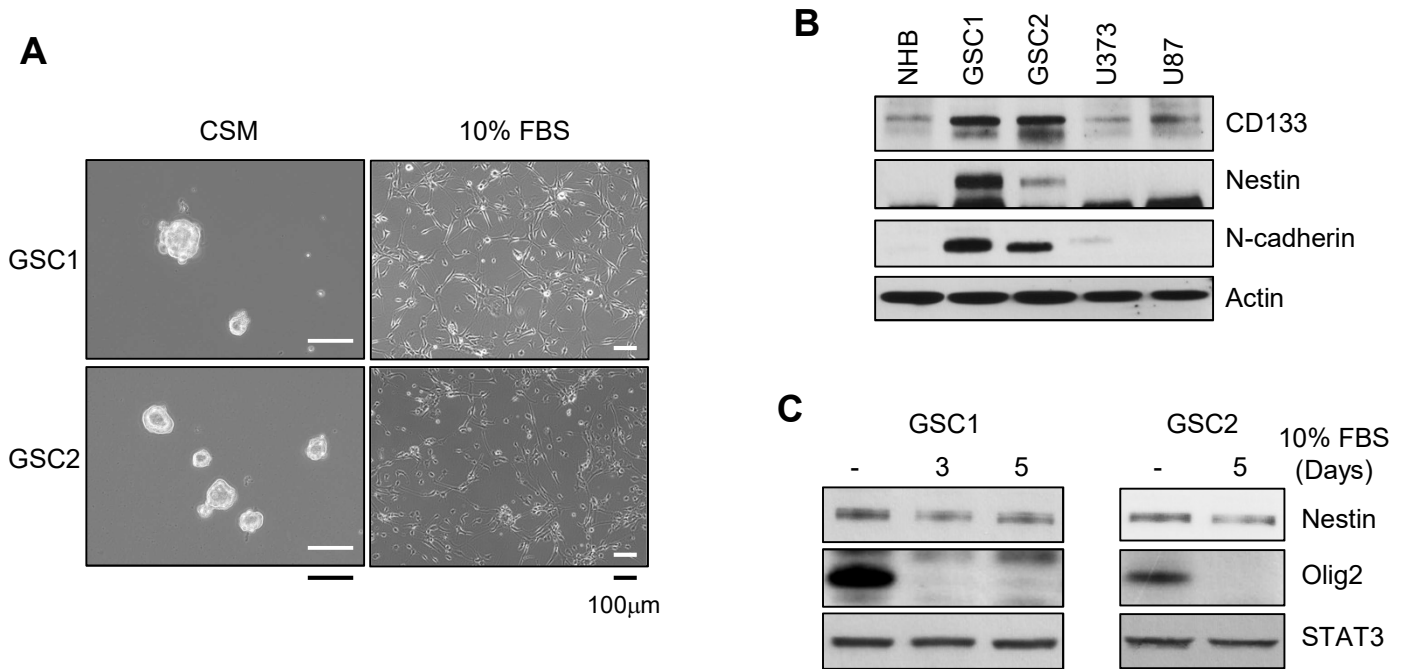

**Figure S6. Characterization of GSCs.** Related to Figure 7.

**A** Morphology of GSCs grown as floating spheres in complete stem medium (CSM) and as monolayers after induction of differentiation in serum-containing medium (10% FBS). Scale bars, 100 $\mu$ m.

**B** Immunoblot of stem cell-related markers (CD133, Nestin and N-cadherin) in the indicated cells.

**C** Immunoblot of Nestin and Olig2 in GSCs before and after induction of differentiation in serum-containing medium. STAT3 was used as a loading control.

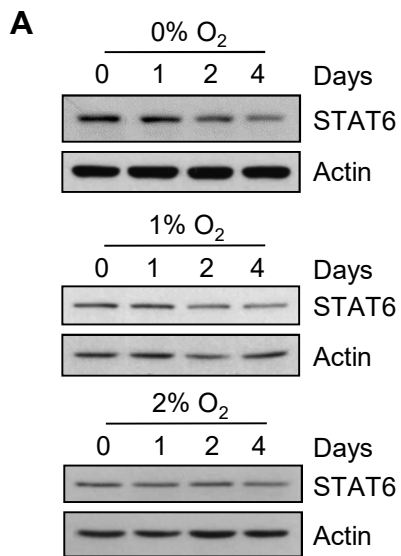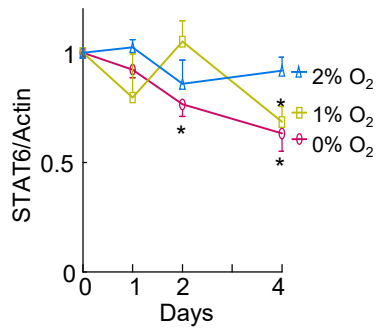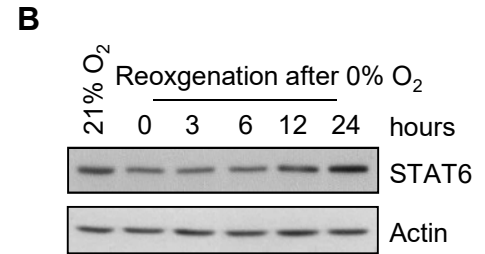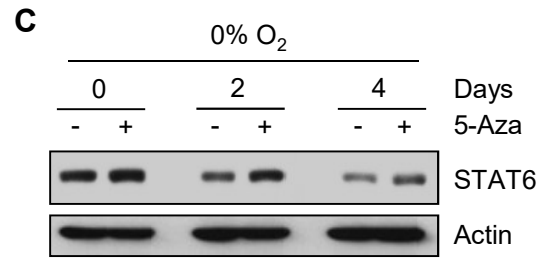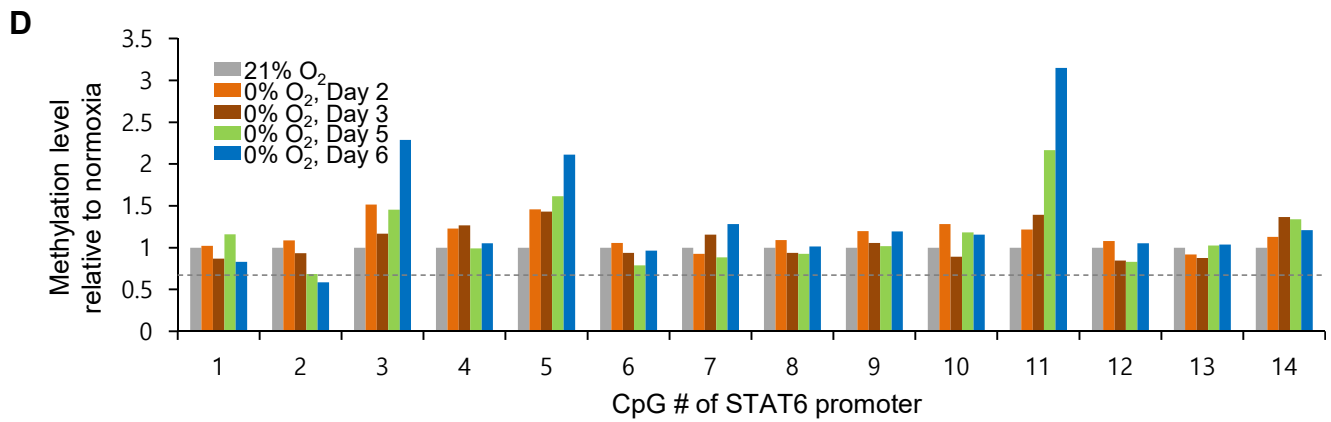



**Figure S7. STAT6 expression is epigenetically silenced during hypoxia.**

**A** Immunoblot of STAT6 in U87 cells exposed to different hypoxic conditions (0%, 1% or 2% O<sub>2</sub>) for the indicated days (top) and summary data (bottom) showing actin-normalized STAT6 levels relative to that in normoxic cells, expressed as fold changes. Results are presented as means  $\pm$  SD (error bars) of three independent experiments (\*p < 0.05 vs. normoxic cells).

**B** Immunoblot of STAT6 in U87 cells exposed to 0% O<sub>2</sub> for 4 days, followed by reoxygenation for the indicated hours.

**C** Immunoblot of STAT6 in U87 cells exposed to 0% O<sub>2</sub> for the indicated days, with or without 1  $\mu$ M 5-Aza.

**D** Bisulfite sequencing of 14 CpG sites in cells exposed to 21% O<sub>2</sub> or the indicated days of 0% O<sub>2</sub>. Summary data show the methylation level of individual CpG sites relative to that in 21% O<sub>2</sub>.
