# Supplementary material for: Epigenetic downregulation of STAT6 increases HIF-1α expression via mTOR/S6K/S6, leading to enhanced hypoxic viability of glioma cells
Source: Springer Nature journal article supplement (doi:10.1186/s40478-019-0798-z), 2019-09-17
Supplement: MOESM2 [file 25666916]

**Table S1. Detailed information on glioma samples used in this study**

| Sample ID | Gender | Age | WHO grade | Diagnosis                              | IDH1 status | Recurrence |
|-----------|--------|-----|-----------|----------------------------------------|-------------|------------|
| NTT1      | M      | 35  | -         | Non tumor                              | -           | -          |
| NTT2      | M      | 28  | -         | Non tumor                              | -           | -          |
| NTT3      | M      | 49  | -         | Non tumor                              | -           | -          |
| NTT4      | M      | 58  | -         | Adjacent non tumor HGG17-paired tissue | -           | -          |
| NTT5      | F      | 64  | -         | Adjacent non tumor HGG9-paired tissue  | -           | -          |
| NTT6      | F      | 73  | -         | Adjacent non tumor HGG18-paired tissue | -           | -          |
| NTT7      | F      | 50  | -         | Adjacent non tumor HGG14-paired tissue | -           | -          |
| NGT1      | M      | 71  | -         | Metastatic adenocarcinoma              | -           | -          |
| NGT2      | M      | 62  | -         | Metastatic adenocarcinoma              | -           | -          |
| LGG1      | M      | 19  | II        | pleomorphic xanthoastrocytoma          | WT          | NO         |
| LGG2      | F      | 25  | I         | gangliocytoma                          | WT          | NO         |
| LGG3      | F      | 42  | II        | chordoid glioma                        | WT          | NO         |
| LGG4      | M      | 50  | II        | oligodendroglioma                      | WT          | NO         |
| LGG5      | F      | 36  | II        | ependymoma                             | WT          | NO         |
| LGG6      | F      | 42  | II        | diffuse astrocytoma                    | R132H       | NO         |
| LGG7      | F      | 55  | II        | ependymoma                             | WT          | NO         |
| HGG1      | M      | 72  | IV        | glioblastoma                           | WT          | NO         |
| HGG2      | M      | 54  | IV        | glioblastoma                           | WT          | NO         |
| HGG3      | M      | 34  | IV        | glioblastoma                           | WT          | NO         |
| HGG4      | F      | 64  | IV        | glioblastoma                           | WT          | NO         |
| HGG5      | F      | 67  | IV        | glioblastoma                           | WT          | NO         |
| HGG6      | M      | 55  | IV        | glioblastoma                           | WT          | NO         |
| HGG7      | M      | 73  | IV        | glioblastoma                           | WT          | NO         |
| HGG8      | F      | 54  | IV        | glioblastoma                           | WT          | NO         |
| HGG9      | F      | 64  | IV        | glioblastoma                           | WT          | NO         |
| HGG9-1    | F      | 63  | IV        | glioblastoma                           | WT          | YES        |
| HGG10     | M      | 75  | IV        | glioblastoma                           | WT          | NO         |
| HGG11     | M      | 40  | III       | anaplastic oligodendroglioma           | R132H       | NO         |
| HGG12     | F      | 35  | III       | anaplastic oligodendroglioma           | R132H       | NO         |
| HGG13     | F      | 59  | IV        | glioblastoma                           | WT          | NO         |
| HGG14     | F      | 50  | III       | anaplastic oligodendroglioma           | R132H       | NO         |
| HGG15     | F      | 57  | IV        | glioblastoma                           | WT          | NO         |
| HGG16     | F      | 44  | III       | anaplastic oligodendroglioma           | WT          | YES        |
| HGG17     | M      | 58  | IV        | glioblastoma                           | WT          | NO         |
| HGG18     | F      | 73  | IV        | glioblastoma                           | WT          | NO         |

**Table S2. The primers used for qRT-PCR**

| <b>Gene</b> | <b>Forward (5'→3')</b> | <b>Reverse (5'→3')</b> |
|-------------|------------------------|------------------------|
| ICAM1       | TAGAGACCCCGTTGCCTAAAA  | AGTACACGGTGAGGAAGGTTT  |
| JAK2        | TTTGCTGTGCGAGCGAGAAAAT | TGAGCGAACAGTTTCCATCTG  |
| NFATC2      | ACAGACTGCATCTAACCCCAT  | CACAACCTTTGGACTCGGATGT |
| IL1B        | ACAGCTGGAGAGTGTAGATCC  | TTTTCTGCTTGAGAGGTGCTG  |
| IL8         | CTGATTTCTGCAGCTCTGTGT  | TGTGGTCCACTCTCAATCACT  |
| CCL2        | AGATGCAATCAATGCCCCAG   | CAGATCTCCTTGCCACAATG   |
| STAT6       | CAAAGCCCTAGTGCTGAAGAG  | CTCCTGCTGTAGCTGGGAATA  |
| HIF1A       | CTGACCCTGCACTCAATCAAG  | TGGGACTATTAGGCTCAGGTG  |
| PML         | TGCAGCTGTATCCAAGAAAGC  | TGACTGTACCACAGCCATAGG  |
| BNIP3       | CAGCTCACAGTCTGAGGAAGA  | GCTTCGGGTGTTTAAAGAGGA  |
| REDD1       | TGACCCTGAGGATGAACACTT  | CAGTAGTTCTTTGCCACCTG   |
| CCL20       | GCTCCTGGCTGCTTTGATGT   | TGCTTGCTGCTTCTGATTCTG  |
| 4E-BP1      | CCATCGTGTGGAGCACTACC   | GAGTGAGGGAGAAAGGGCTG   |
| Actin       | AGAGCTACGAGCTGCCTGAC   | AGCACTGTGTTGGCGTACAG   |

**Table S3. Targets CpG islands and the primers for pyrosequencing**

| Gene                   | Primer (5'→3')       |                              | Size(bp) |
|------------------------|----------------------|------------------------------|----------|
| <i>Stat6</i><br>(+807) | Forward              | GTGGTTTAGAAGAGGGGGAATTTT     | 174      |
|                        | Biotinylated-reverse | AACAACCTCTCTAAATTACCCAATAC   |          |
|                        | Sequencing (+807)    | TGTTGTAGAAGTTGAGATTT         |          |
|                        | Sequencing (+854)    | GTGTTGAATTGGTTTTATTTT        |          |
| <i>Stat6</i><br>(+967) | Forward              | ATTGGGTAATTTAGAGAAGTTGTTTTAA | 164      |
|                        | Biotinylated-reverse | AACCAATATTACCTCCCAAACCT      |          |
|                        | Sequencing (+913)    | ATTTAGAGAAGTTGTTTTAAT        |          |
|                        | Sequencing (+967)    | AGATAGGGGTTGAGATA            |          |

**Table S4. PCR Primers for Expressing Vectors**

|           | Forward (5'→3')                    | Reverse (5'→3')                 |
|-----------|------------------------------------|---------------------------------|
| STAT6-d1  | CTGGATGAAGTCCTGAGAACCCT<br>CGTCAC' | GCGATCGCGGCGGCAGAT<br>CTCCTC    |
| hSTAT6-d2 | GCCTTCTCTGAGATGGACCGCGTGC          | GAGGGTTCTCAGGACTTCATCC<br>AGCCG |
| hSTAT6-d3 | GTCCTGGACCTCACCAAACGCTGTC          | ATTGTCCACAGGATAGTGGCT<br>TTGG   |
| hSTAT6-d4 | ATCCAAGAAGCCCAAGGATGAGGC           | CCGGAGACAGCGTTTGGTGAG<br>GTCC   |
